# Supplementary material
Source: PubMed Central journal article supplement (PMC5107152)
Supplement: NIHMS821030-supplement-401_2016_1623_MOESM1_ESM.pdf [file NIHMS821030-supplement-401_2016_1623_MOESM1_ESM.pdf]

## Electronic Supplementary Material 1

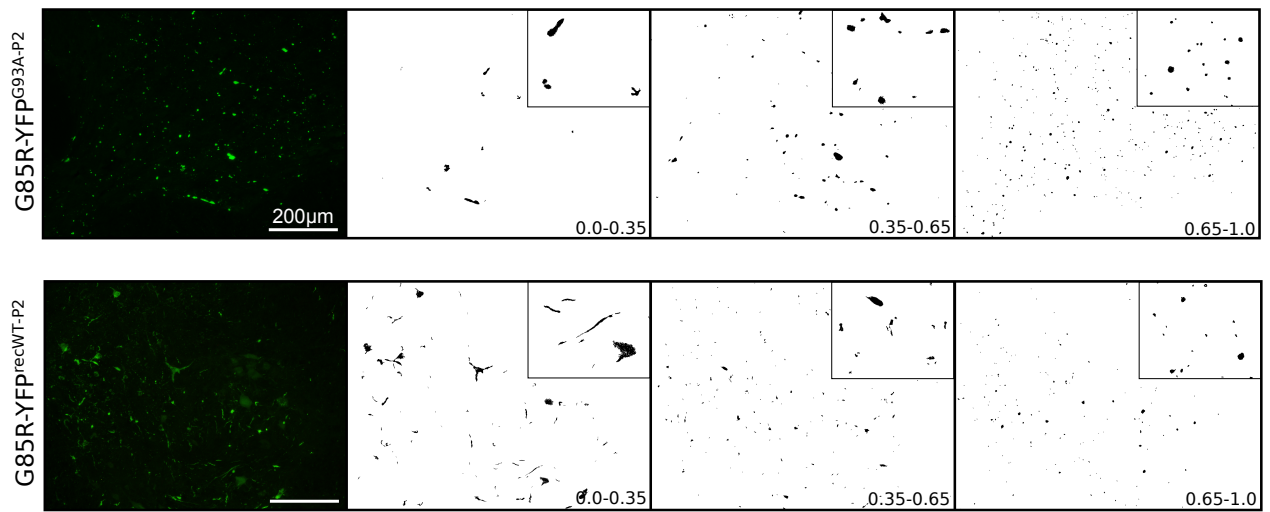

**ESM1** Results from ImageJ algorithm differentiating inclusion circularity. Each image was thresholded and the circularity for each inclusion was grouped into 3 categories based on its value: fibrillar (0.0-0.35), intermediate (0.35-0.65), and round (0.65-1.0). n=3 images per animal and 3 animals per cohort.
